# Supplementary material for: Electrochemical Biosensor Based on Chitosan- and Thioctic-Acid-Modified Nanoporous Gold Co-Immobilization Enzyme for Glycerol Determination
Source: MDPI journal article supplement (doi:10.3390/chemosensors10070258), 2022-07-02
Supplement: s1 [file s1]

Archive with 1 entries (1 files):
- chemosensors-1774174-supplementary.pdf
