# Supplementary material for: Electrochemical Biosensor Based on Chitosan- and Thioctic-Acid-Modified Nanoporous Gold Co-Immobilization Enzyme for Glycerol Determination
Source: MDPI journal article supplement (doi:10.3390/chemosensors10070258), 2022-07-02
Supplement: s1 [file s1 › chemosensors-1774174-supplementary.pdf]

# Supplementary Materials for Electrochemical Biosensor Based on Chitosan- and Thioctic-Acid-Modified Nanoporous Gold Co- Immobilization Enzyme for Glycerol Determination

Caiyun Yan <sup>1</sup>, Kaifeng Jin <sup>2</sup>, Xiangyi Luo <sup>3</sup>, Jinhua Piao <sup>1,\*</sup> and Fang Wang <sup>4,\*</sup>

<sup>1</sup> School of Food Science and Engineering, South China University of Technology, Guangzhou 510641, China; 201920124942@mail.scut.edu.cn

<sup>2</sup> School of Life Science, Jilin University, Changchun 130012, China; jinkf1620@mails.jlu.edu.cn

<sup>3</sup> Department of Mathematics, Northeast Forestry University, Harbin 150040, China; luoxiangyi@nefu.edu.cn

<sup>4</sup> School of Environmental Engineering and Chemistry, Luoyang Institute of Science and Technology, Luoyang 471023, China

\* Correspondence: jhpiao@scut.edu.cn (J.P.); wangfang1116@163.com (F.W.)

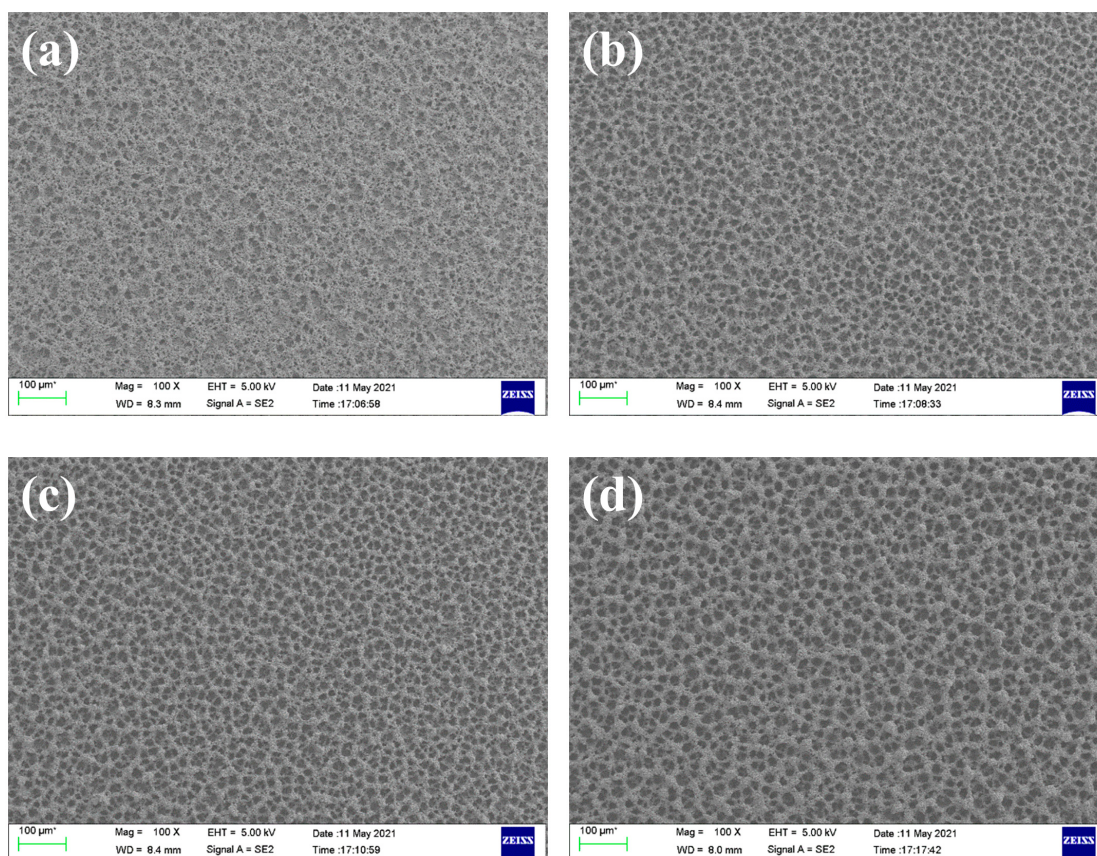

**Figure S1.** SEM images of NPG electrodeposited at (a) -1, (b) -2, (c) -3 and (d) -4 V for 50 s.

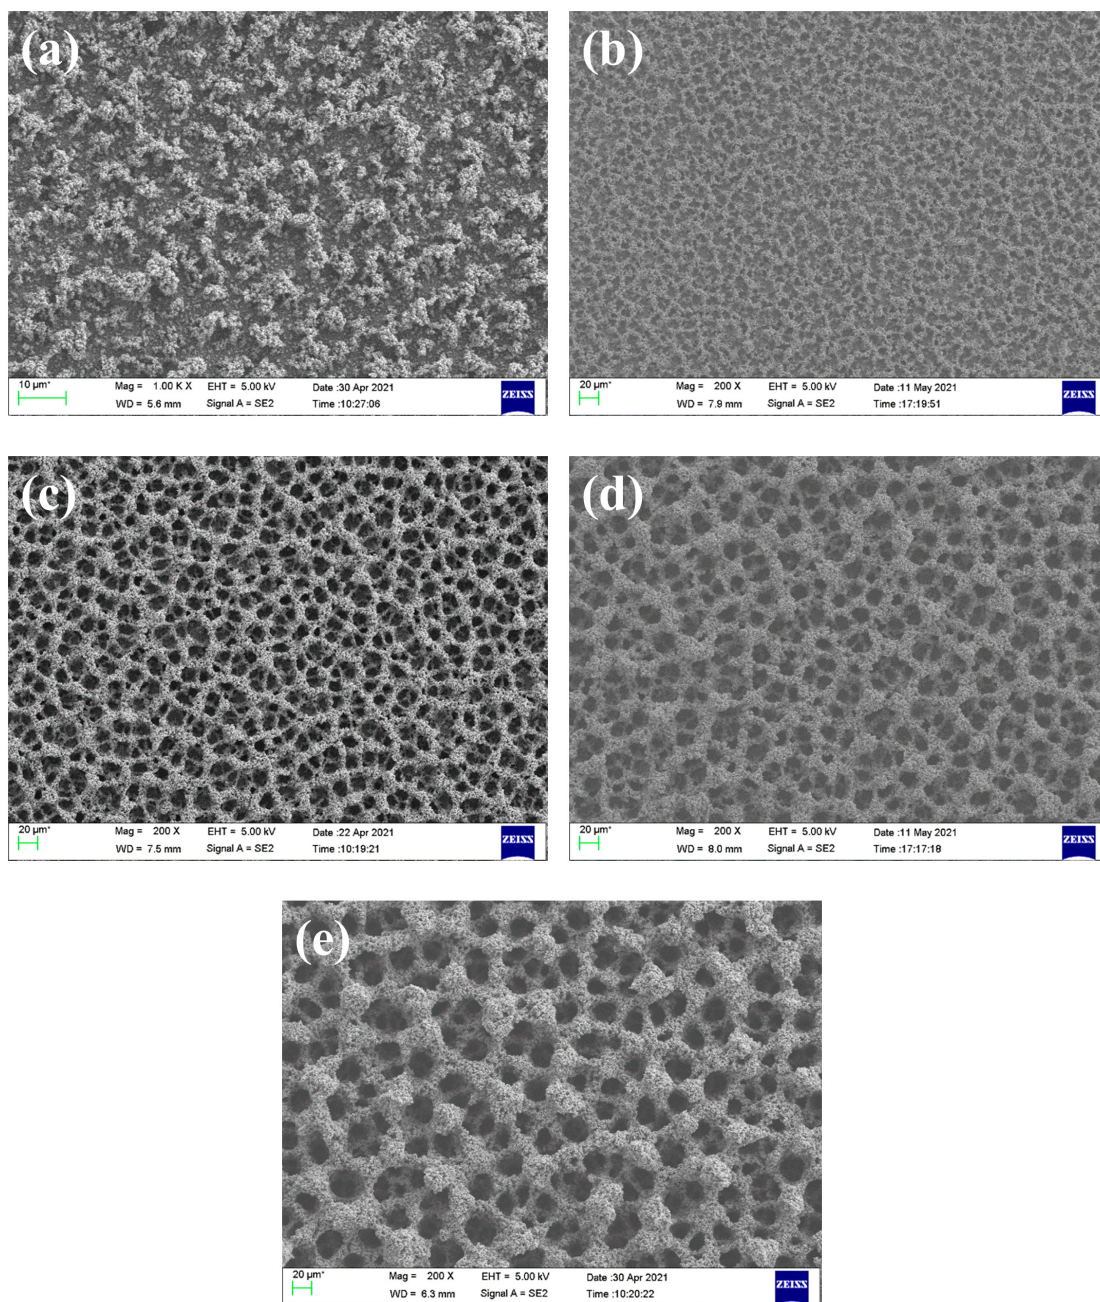

**Figure S2.** SEM images of NPG electrodeposited at  $-4$  V for (a) 10, (b) 30, (c) 50, (d) 70 and (e) 90 s.

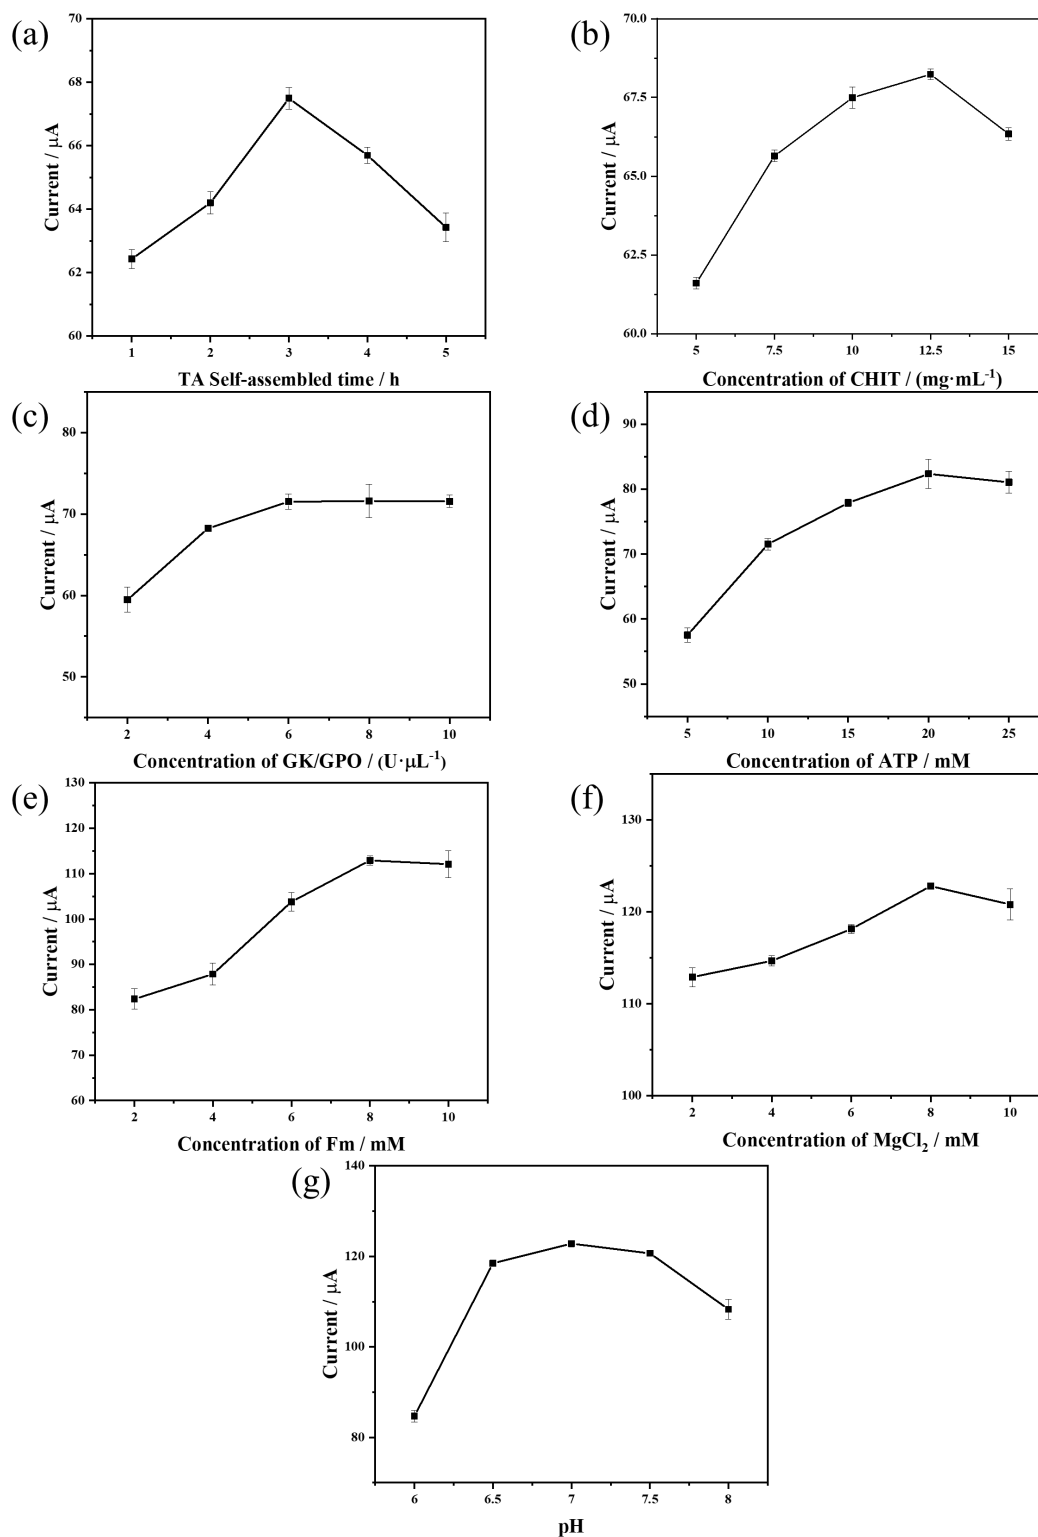

**Figure S3.** Effect of several variables on the response current of the GK/GPO/CHIT/TA/NPG/AuE biosensor: (a) TA self-assembled time, (b) the concentration of CHIT, (c) the concentration of GK/GPO, (d) the concentration of ATP, (e) the concentration of Fm, (f) the concentration of  $\text{MgCl}_2$  and (g) pH.

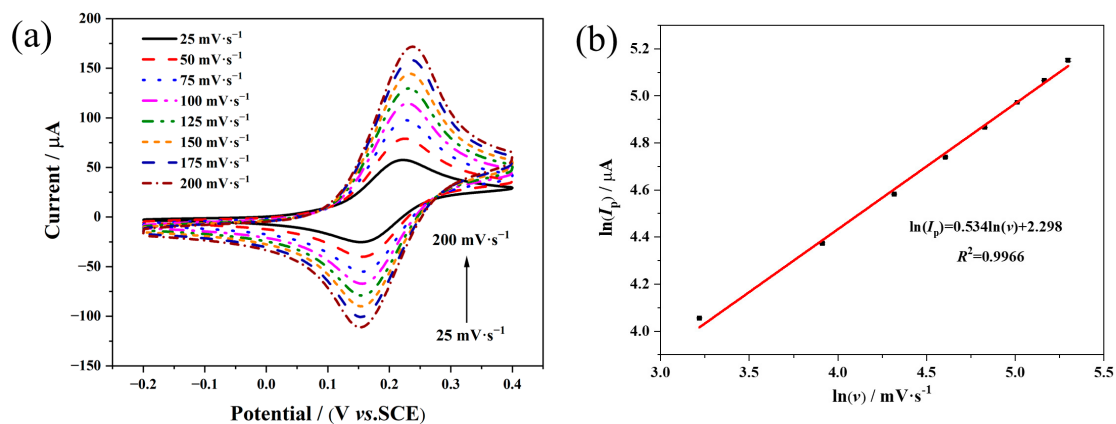

**Figure S4.** (a) CV response of the GK/GPO/CHIT/TA/NPG/AuE biosensor measured in 0.1 M PB (pH 7.0) containing 20 mM ATP, 8 mM Fm, 8 mM MgCl<sub>2</sub> and 1 mM glycerol at different scan rates (25~200  $\text{mV}\cdot\text{s}^{-1}$ ), and (b) corresponding linear relationship between anodic peak current and scan rate.

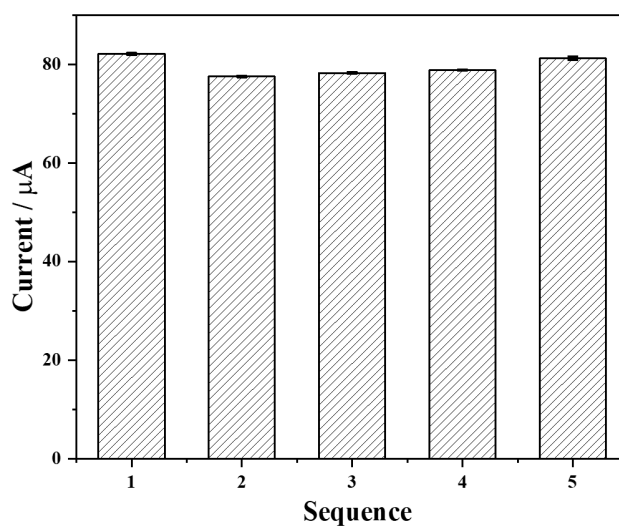

**Figure S5.** Repeatability of the GK/GPO/CHIT/TA/NPG/AuE modified electrode in 0.1 M PB (pH 7.0) containing 20 mM ATP, 8 mM Fm, 8 mM MgCl<sub>2</sub> and 1 mM glycerol at a scan rate of 50  $\text{mV}\cdot\text{s}^{-1}$ .

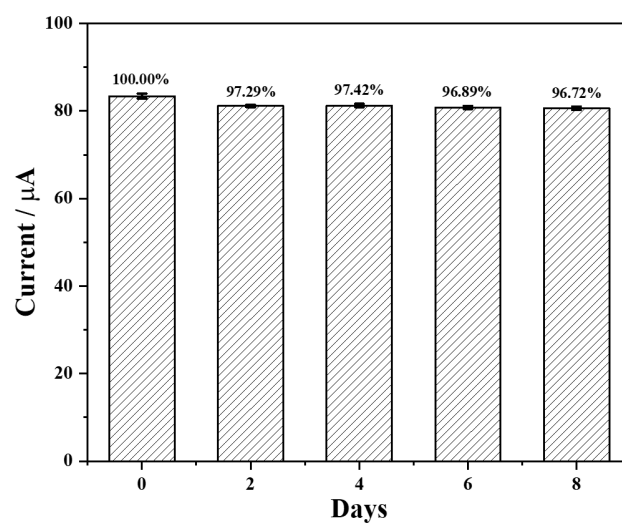

**Figure S6.** Storage stability of the GK/GPO/CHIT/TA/NPG/AuE modified electrode in 0.1 M PB (pH 7.0) containing 20 mM ATP, 8 mM Fm, 8 mM  $\text{MgCl}_2$  and 1 mM glycerol at a scan rate of  $50 \text{ mV} \cdot \text{s}^{-1}$ .
